1 **Species-specific strategies increase unpredictability of escape flight in eared moths**

2

3 Theresa Hugel<sup>1\*</sup>, Holger R. Goerlitz<sup>1\*</sup>

4

5 <sup>1</sup> Acoustic and Functional Ecology Group, Max Planck Institute for Ornithology, Seewiesen, Germany

6

7 **\*corresponding authors:**

8 Email: [thuegel@orn.mpg.de](mailto:thuegel@orn.mpg.de), [hgoerlitz@orn.mpg.de](mailto:hgoerlitz@orn.mpg.de)

9

10 **Short title:** Species-specific escape flight in moths

11 **ABSTRACT**

12 Many prey animals form mixed-species groups. Mixed-species groups provide various benefits  
13 ranging increased food intake to increased chance of predator detection. The escape-tactic diversity  
14 hypothesis predicts another benefit. It postulates that the overall unpredictability of evasive movement  
15 is increased if multiple species with different evasive tactics mix, resulting in enhanced predator  
16 protection for the whole group. Echolocating bats and eared moths are a textbook example of predator-  
17 prey interactions. Moths exhibit evasive flight with diverse tactics; however, the variability of their  
18 evasive flight within and between species has never been systematically quantified. We therefore  
19 recorded flight strength of eight moth species in response to the same level of simulated bat predation.  
20 We show species-specific and size-independent differences in both overall flight strength and in  
21 change of flight strength over time, confirming the escape-tactic diversity hypothesis for eared moths.  
22 Additionally, we show strong inter-individual differences in evasive flight within some species. This  
23 diversity in escape tactic between eared moths increases the overall unpredictability of their evasive  
24 flight in mixed-species groups, likely providing better protection against predatory bats for the single  
25 individual.

26

27 **KEYWORDS**

28 anti-predator behaviour, comparative analysis, escape-tactic diversity, last-ditch evasive flight,  
29 Lepidoptera, mixed-species group,

## 30 **BACKGROUND**

31 To successfully escape from a predator in a chase, prey animals have two main options: being faster or  
32 being more manoeuvrable [1]. Higher manoeuvrability allows prey to abruptly change its movement  
33 trajectory, making its behaviour variable and unpredictable. Unpredictable, erratic, or “protean”  
34 behaviour is a common escape strategy found in numerous prey taxa [2,3]. In addition to variability  
35 within an individual and a species, interspecific variability in escape behaviour has the potential to add  
36 another level of unpredictability. If multiple species in a prey community vary in the parameters of  
37 their evasive movement, the overall variability and unpredictability would increase and afford even  
38 higher protection against predators for the single individual [4]. Previous studies of prey communities  
39 have shown that different species can use very different anti-predator strategies [5–8], such as shifting  
40 microhabitat versus reducing activity in response to the same predation risk [6]. In addition, prey  
41 could also exhibit inter-specific differences within one specific anti-predator strategy, such as evasive  
42 movement (‘escape-tactic diversity hypothesis’, [4]). One potential explanatory factor for interspecific  
43 differences in evasive behaviour might be interspecific differences in anatomy, such as muscle  
44 volume, weight and size, which are correlated with speed, acceleration and turning performance [9].  
45 Echolocating bats and eared moths are an ideal study system to address this question. Both groups  
46 interact in an evolutionary arms race [10–12]. Many insectivorous bats have a broad diet consisting of  
47 many different species [13–15], which they hunt by echolocation in mid-air [16,17]. Many flying  
48 moths rely on evasive flight to escape echolocating bats. Moth evasive flight involves a two-staged  
49 response towards an attacking bat [8]. For distant bats, moths receive a faint echolocation call and  
50 steer away from the bat to avoid detection. For a close-by bat, moths receive a loud call and elicit last-  
51 ditch evasive flight to escape the bat. The last-ditch evasive flight performed by many eared moths  
52 when trying to escape an echolocating bat includes zig-zagging, loops, tight turns, passive dives, and  
53 power dives [18,19]. Despite decades of research, this evasive behaviour was never systematically  
54 quantified and compared on a species level. Several studies observed a “general response” without  
55 going into further descriptions or quantifications of the actual behaviour [20–22], or quantified only  
56 the consequences of anti-predator behaviour [23,24], or lacked species identification or standardized

57 conditions [25–28]. Hence, it is unknown if variation in evasive flight occurs within a single  
58 individual, between individuals from the same species, or between different species.

59 Here, we systematically quantified vertical flight strength of eight species of sympatric eared moths  
60 with different sizes during tethered flight in a flight recorder. We studied size as one explanatory  
61 variable underlying potential species-specific differences in evasive flight, since size is positively  
62 correlated with acceleration in a butterfly [29], and negatively correlated with manoeuvrability in  
63 insects [30]. We use vertical flight strength as proxy for flight speed, which is considered to increase  
64 when moths perform last-ditch evasive flight. All individuals were exposed to the same acoustic  
65 stimulus mimicking an attacking bat, to trigger last-ditch evasive flight. We quantified the inter-  
66 individual and inter-specific variability within a single anti-predator-strategy, testing (I) the hypothesis  
67 of escape-tactic diversity in moths, assuming that last-ditch evasive flight varies between individuals  
68 and species within a sympatric moth community, and (II) that moth size is one explaining variables for  
69 this variation.

70

71

## 72 **METHODS**

73

### 74 **Flight recorder and experimental setup**

75 We developed a flight recorder to quantify moths' vertical flight strength (figure 1*a*). The transducer  
76 consisted of two small broadband loudspeakers (25 mm nominal diameter; NSW1-205-8A,  
77 AuraSound, Guangzhou, China), which were connected via a light wooden connector that was glued  
78 onto the loudspeakers' membranes. A plastic cylinder was centrally fixed to the wooden connector and  
79 served as a holder for an insect pin attached to a moth (see below). Vertical forces generated by the  
80 moth's flight were transferred via the pin and the wooden connector to the membranes of both  
81 speakers, generating voltage fluctuations that were amplified and recorded via a soundcard (192 kHz  
82 sampling rate, 16 bit resolution; Fireface UC, RME, Haimhausen, Germany). The flight recorder was  
83 mounted centrally in an anechoic chamber (Desone Modular Akustik, Berlin, Germany, interior  
84 volume: 0.96x0.96x0.77m<sup>3</sup>, figure 1*b*). A loudspeaker (NeoCD1.0 Ribbon Tweeter, Fountek

85 Electronics, Jiaxing, China) was mounted 34 cm behind the moth and driven by a power amplifier  
86 (TA-FE330R, Sony, Tokio, Japan) connected to the soundcard. The loudspeakers' frequency response  
87 and output level was measured at the moth's position using a calibrated measuring microphone (40BF,  
88 with pre-amplifier 26AC and Power Module 12AA, GRAS Sound & Vibration, Holte, Denmark). Two  
89 infrared video cameras (Flea 3, FLIR Integrated Imaging Solutions, Richmond, Canada, with  
90 HF12.5HA-1B lenses, Fujinon, Tokyo, Japan) at 30 cm distance below and in front of the moth  
91 recorded its behaviour, illuminated by four infrared lights (850 nm, Mini IR Illuminator TV6700,  
92 ABUS Security-Center, Affing, Germany) installed in the corners around the frontal camera. Stimulus  
93 presentation and data acquisition of flight recorder and cameras was controlled with custom MATLAB  
94 code (The Mathworks Inc., Natick, Massachusetts, USA).

95

## 96 **Stimulus**

97 Last ditch flight behaviour in many moths is argued to be elicited by activation of the auditory  
98 receptor neuron A2 [32–34]. A2 sensitivity depends on frequency, having highest sensitivity between  
99 15 to 60 kHz [32,34–38]. We therefore designed a stimulus to elicit last ditch flight behaviour and  
100 mimicking an attacking bat [39–41], consisting of 120 pure tones at 35 kHz, each having 4 ms  
101 duration plus 0.5 ms raised-cosine-ramps and 25 ms pulse interval (PI), resulting in a total length of  
102 3 s. Sound pressure level at the moth was 80 dB SPL RMS re. 20  $\mu$ Pa, i.e., about 8 to 17 dB above A2  
103 threshold depending on moth species [32,35–37]. We recorded moth flight strength from 2 sec before  
104 until 1 sec after stimulus presentation, resulting in a 6 s-long recording in total. Stimuli were presented  
105 to non-flying and flying moths.

106

## 107 **Moth species**

108 We conducted the experiment at the Siemers Bat Research Station in Tabachka, N-Bulgaria, between  
109 17 June and 22 August 2017. We caught moths with two light traps (Sylvania, blacklight,  
110 F15W/350BL-T8, USA) between dusk and midnight on a plateau with wild meadow and some  
111 scattered bushes. Since we only caught moths at this one site, we assume that all species use a similar  
112 habitat and activity windows and thus experience the same predation threat by bats. Caught moths

113 were individually kept in Falcon tubes until being tested on the same night. Species were identified  
114 using Steiner et al. 2014 [42]. We selected moth species based on availability and on the absence of  
115 any other known anti-predator strategy in that species, such as chemical defence or jamming. We  
116 tested 172 individuals of eight different eared species and two families: *Amphipyra pyramidae*,  
117 *Helicoverpa armigera*, *Heliothis adauca*, *Noctua comes*, *Noctua fimbriata*, *Noctua janthe* and  
118 *Xestia c-nigrum*, which all belong to the family of Noctuidae, and *Deilephia porcellus* belonging to  
119 the family of Sphingidae. To attach the insect-pin to a moth, we placed individual moths on a piece of  
120 foam, held it in place with a soft, coarse-meshed plastic grid, removed the scales on the thorax gently  
121 with a scalpel, and glued the flat head of an insect needle to the thorax using cyanoacrylate glue. As  
122 soon as the glue set, the needle was inserted into the flight recorder with the moth facing away from  
123 the loudspeaker.

124

#### 125 **Surface area measurement**

126 We measured the surface area of 130 moths, mainly (72.7 %) overlapping with tested individuals (see  
127 electronic supplementary material, table S1). All individuals were deep frozen for at least 24 hours and  
128 then fixed on a sheet of squared paper with completely spread wings to ensure maximum surface area.  
129 Photos were taken from fixed distance and surface area was measured using Image J (National  
130 Institute of Health, Bethesda, USA). We converted photos of moths into 8bit-black-and-white-images,  
131 manually adjusted their intensity threshold to detect moth area. We used the automatic outline  
132 detection to detect the moth's outline and calculated the area within the outline. Measured surface area  
133 of individuals covered a range from 343 to 1008 mm<sup>2</sup> (see electronic supplementary material, figure  
134 S1). We assigned the species' mean value to individuals without size measurements for subsequent  
135 statistical analyses. This does not affect the potential correlation between size and flight strength, but  
136 makes its detection more difficult due to reduced variation in size, making our analysis more  
137 conservative.

138

139

140

## 141 **Analysis of flight strength**

142 The flight movement of the tethered moths moved the two loudspeaker membranes and thus generated  
143 voltage fluctuations, which we recorded from 2 sec before until 1 sec after presentation of the 3-sec-  
144 long stimulus. For further analysis, we only analysed the time period around stimulus onset, from 1 s  
145 before to 1 s after stimulus onset. We calculated the root-mean-square (RMS) of the recorded voltage  
146 per 100 ms bins, resulting in 20 measurements per speaker over the analysed duration of 2 s. We  
147 express the measurements in dB FS RMS, i.e., as negative values on a logarithmic scale relative to the  
148 highest recordable voltage of the flight recorder (= 0 dB FS; FS: full scale), and as the mean of both  
149 loudspeakers. We will refer to this value as flight strength, since low to high values correspond to non-  
150 flying moths to different degrees of flight activity in flying moths. Since we recorded nine and three  
151 individuals two and three times, respectively, we used for each individual only the first recording for  
152 analysis.

153 We performed a Principal Component Analysis (PCA) to identify different types of reaction in  
154 response to simulated bat calls, such as onset/cessation of flight or increase/decrease in flight strength  
155 with stimulus onset. Classically, PCA is used to reduce the number of correlated explanatory variables  
156 to fewer uncorrelated variables, the so-called Principle Components (PCs) that have the most  
157 explanatory power. In our case, we used the PCA to reduce the number of 20 correlated flight strength  
158 measurements collected over 20 time bins to a smaller number of PCs that reflect the most common  
159 types of reaction. For each PC, we obtained one loading per time bin (i.e., 20 loadings in total).  
160 Combining loadings with PC-scores reconstructs the original flight strength data; comparing loadings  
161 over time bins therefore revealed patterns of changing flight strength over time.

162 Some moths flew irregularly or stopped flying after some time. We thus split our dataset into moths  
163 that were flying before stimulus onset (“active moths”) and those that were not flying (“inactive  
164 moths”). Initial analysis showed that flight strengths in non-flying moths was -83 dB FS RMS, while  
165 flying moths had higher values. Hence, we set the threshold between active and non-active  
166 conservatively to -80 dB FS RMS and analysed flight strength in the bins at 1.0 – 0.9 s and 0.1 – 0 s  
167 before stimuli onset. If flight strength was above threshold in both bins, an individual was defined as  
168 “active” (N=92; table S1), if flight strength was below threshold in both bins, it was defined as

169 “inactive” (N=74; table S1). Six individuals had flight strengths once above and once below threshold  
170 in those bins and were excluded (table S1). We used linear models to fit PCs as a function of the fixed  
171 effects species (categorical) and surface area (continuous; R version 3.3.2, R Foundation for Statistical  
172 Computing, Vienna, Austria; RStudio, version 1.1.463, RStudio, Boston, USA). We tested for a  
173 significant effect of factors on PC-values using likelihood ratio tests to compare the full model to the  
174 model excluding a factor.

175

176

## 177 **RESULTS**

178 In total, we tested the flight behaviour of 172 individuals of eight eared moth species. 92 individuals  
179 were flying before stimulus onset (“active moths”), while 74 were non-flying before stimulus onset  
180 (“non-active moths”; Table S1). Since we were interested to study evasive flight in flying moths, we  
181 focus in the following on the active moths. Sample size varied between species as this depended on  
182 moth availability, ranging from 33 (*H. armigera*) to two individuals (*H. adaucta*, *D. porcellus*).  
183 Reactions to the acoustic stimulus were mostly consistent within a species, but differed between  
184 species (figure 2). We found three main reaction types in active moths, either constant flight strength  
185 over time, or increasing or decreasing flight strength after stimulus onset. In addition, both the median  
186 flight strength and its inter-individual variation differed between moth species. For example, *H.*  
187 *armigera* and *N. fimbriata* both showed fairly constant flight strength over time, but differed in their  
188 median and inter-individual variation. Flight strength of the 33 individuals of *H. armigera* ranged  
189 from -80 to -50 dB FS, with a median around -63 dB FS, while all 12 individuals of *N. fimbriata* had a  
190 constant and high flight strength around -50 dB FS. *X. c-nigrum* and *N. janthe* increased their flight  
191 strength after stimulus onset, with *N. janthe* (N=32) also showing a clear reduction in inter-individual  
192 variation after stimulus onset. *H. adaucta*, *D. porcellus* and *N. comes* all decreased their flight  
193 strength, with additional variation in overall flight strength, timing and exact temporal pattern of the  
194 change. The three individuals of *A. pyramidae* showed a mix constant, increasing and decreasing flight  
195 strength.



196 We used a PCA to reduce the temporal correlation in flight strength measurements and to obtain  
197 behavioural categories for testing the above observations. The first two components of the PCA of  
198 active moths explain 95.7% of the overall variation in flight strength (figure 3a, PC1: 82.6%, PC2:  
199 13.1%), with overlapping clusters in PC1 and PC2 scores between species (figure 3b). Loadings of  
200 these two components (electronic supplementary material, table S2) match the observed reaction types  
201 towards the stimulus. Loadings for PC1 are almost constant over time. Hence, PC1 scores describe the  
202 general flight strength of an individual (figure 3c). Loadings for PC2 invert their sign over time (from  
203 negative before stimulus onset to positive after stimulus onset) and therefore describe the temporal  
204 pattern of flight strength, which can be either increasing (for positive individual PC2 scores), constant  
205 (for PC2 scores close to Zero) or decreasing (for negative individual PC2 scores; figure 3d). Hence,  
206 PC2 scores describe the reaction type of an individual.

207 We found significant species-specific differences in the PC1 and PC2 scores, confirming species-  
208 specific flight strength and reaction types in response to acoustic stimuli (figure 3e, f). While the  
209 whole population of all tested moth species shows a large variation in PC1 and PC2 scores, each  
210 species only clusters within a smaller range of PC1 and PC2 scores, respectively (figure 3e,f, compare  
211 'all' versus each species). PC1 scores were significantly affected by species ( $p < 0.001$ ), but not by  
212 surface area ( $p = 0.64$ ). The PC1 score captures the species-specific median and variation in flight  
213 strength observed before. For example, *N. fimbriata* having high and constant flight strength also has  
214 high PC1 scores with little variation. *H. armigera*, having intermediate flight strength with high  
215 variation, also has intermediate PC1 scores with high variation; and *H. adauca* shows both low flight  
216 strength and low PC1 scores. PC2 scores were significantly affected by species ( $p < 0.001$ ), but not by  
217 surface area ( $p = 0.34$ ). The PC2 score captures the species-specific reaction type, i.e., the change in  
218 flight strength over time as observed before. For example, *H. armigera* and *N. fimbriata* have fairly  
219 constant flight strength over time, and correspondingly have PC2 scores close to Zero.  
220 Correspondingly, positive (*X. c-nigrum*, *N. janthe*) and negative (*H. adauca*, *D. porcellus*, *N. comes*)  
221 PC2 scores capture increasing and decreasing flight strength over time, respectively.

222 In addition to the 92 active moths that were flying at stimulus onset, we also tested 74 non-active  
223 moths that were motionless at stimulus onset (Fig. S2, S3). Despite the very different initial state of

224 the moths (flying vs. non-flying), we can see similar behavioural changes. Particularly for *N. janthe*,  
225 most of the 57 non-active individuals started to fly after stimulus onset, matching the increased flight  
226 strength observed in active moths.

227

228

## 229 **DISCUSSION**

230 Using standardized measures in a novel flight recorder, we show for the first time species-specific  
231 reactions in eared moths in response to the same bat-like sounds, and thus inter-species differences in  
232 evasive flight strategies within a sympatric moth community. These clear species-specific reactions  
233 are particularly remarkable given our rather simple measured variable and the artificial tethered flight  
234 which limits moths in their flight behaviour and probably affects their motor-sensory feedback loop  
235 [43]. Although free-flight experiments will be required to link vertical flight strength in tethered flight  
236 to actual three-dimensional flight trajectories, our observations are further supported because the  
237 reaction of a given species was independent of whether individuals were flying or not at stimulus  
238 onset. This suggests that last-ditch evasive flight is to some extent hardwired and can be elicited by the  
239 appropriate acoustic input. In addition, however, a substantial amount of variation in flight strength  
240 also existed between individuals in some species. Whether some moths furthermore show variation  
241 within individuals between subsequent executions of evasive flight is yet unknown. In summary, our  
242 data supports the hypothesis of escape-tactic diversity in moths. An echolocating bat preying on a  
243 multi-species prey community with prey-species-specific differences in evasive flight faces larger  
244 variation and unpredictability than would be generated by any single species. Species-specific  
245 differences in evasive flight within prey communities thus likely provide increased protection against  
246 predators for each individual in the community.

247 Our data of eight moth species suggest two key components of last-ditch evasive flight: overall flight  
248 strength and temporal reaction type, with each species showing its unique combination and therefore  
249 filling its own ecological niche. We could only test a large number of individuals in three species  
250 (*Noctua fimbriata*, *Helicoverpa armigera*, *Noctua janthe*). Even though all three belong to the family  
251 Noctuidae, they exhibited different strategies for evasive flight. *N. fimbriata* flew constantly strong

252 without intraspecific variation and no temporal change in response to acoustic stimulation. Similarly,  
253 *H. armigera* flew constantly with intermediate flight strength and no temporal change in response to  
254 acoustic stimulation, yet showed strong intra-specific variation. *N. janthe* also flew with intermediate  
255 flight strength with intra-specific variation, yet all individuals increased their flight strength after  
256 acoustic stimulation. What might our observations in the flight recorder mean under real world free-  
257 flight conditions? Of the three species with high sample size, *N. janthe* was the only one with a clear  
258 change in flight strength with stimulus onset. It increased its flight strengths after stimulus onset and  
259 reached maximum flight strength within 200-300 ms after stimulus onset, corresponding to 8-12  
260 pulses of our acoustic pulse train. Arguably, this increase in flight strength corresponds to a certain  
261 kind of last ditch flight behaviour under natural free-flight conditions. *H. armigera* did not change its  
262 flight strengths, yet showed a high variability in flight strength between individuals. This inter-  
263 individual variability might relate to a generally variable flight behaviour between individuals that  
264 could already function as general anti-predator strategy. *N. fimbriata* showed the strongest and the  
265 most uniform flight strength of all tested species, without a reaction to the acoustic stimulus. The high  
266 flight strength of this species might indicate that it is a fast flyer and thus difficult to catch. This is  
267 supported by the large size of *N. fimbriate* ( $932.6 \pm 54.8$  mm<sup>2</sup>, mean $\pm$ std), which is positively  
268 correlated with acceleration in Lepidoptera [29]. The remaining moth species with lower sample size  
269 showed further variation in general flight strength and its temporal pattern, suggesting that they exhibit  
270 different flight trajectories in response to acoustic stimulation. For example, *Noctua comes* showed  
271 increasing and decreasing flight strength, which might correlate with acceleration and subsequent  
272 deceleration. *Heliothis adauca* and *Deilephila porcellus* both reduced flight strength, however with  
273 different temporal patterns: *H. adauca* decreased flight strength already within the first 100 ms and  
274 reached its minimum within 200 ms, while *D. porcellus* decreased flight strength only after 400 ms.  
275 Both patterns might represent different types of (power) dives in response to an attacking bat.  
276 Interestingly, *D. porcellus* flew with higher flight strength before stimulus onset than *H. adauca*,  
277 which might represent a higher flight speed, allowing it to react later to an attacking bat.  
278 As *N. fimbriata* and *H. armigera* did not change their flight strength in response to our stimulus,  
279 consisting of 35 kHz pure tones at 80 dB SPL RMS, it is possible that our stimulus was inaudible for

280 those species, or audible yet too faint to trigger evasive flight or to be perceived as sufficiently high  
281 predation risk. Although neuronal audiograms of multiple species suggest that our stimulus is above  
282 the threshold of the A2-cell of moths [32,35–37], little is known about how neuronal activity translates  
283 into evasive flight. Behavioural thresholds are generally higher than neuronal thresholds, although the  
284 exact differences and potential variation between species are mostly unknown (for discussion, see  
285 [44]). Variation in the translation from neuronal activity to evasive flight might even add additional  
286 unpredictability to the evasive flight of moths. Lastly, additional anti-predator strategies could reduce  
287 the need for evasive flight. Although we caught all moths in the same open-field habitat, moths might  
288 still possess species-specific differences in flight behaviour. For example, flying closer to the ground  
289 or vegetation could be a potential anti-predator strategy, as close-by background structures impairs  
290 bats' capture success due to sensory and motor constraints [45].

291 Although size affects flight capabilities, we did not detect an effect of size on flight strength (PC1) or  
292 main temporal reaction type (PC2). While a direct influence of size on temporal reaction type is not  
293 obvious, we would have expected to find a positive correlation between moth size and flight strength.  
294 The lack of this correlation might be due to the small number of individuals for some species, or too  
295 few species tested altogether; or it might be a true effect. The lack of this correlation might have been  
296 driven by the benefits of increased unpredictability, reducing size-dependent constraints on flight  
297 strength.

298

## 299 **CONCLUSION**

300 Our data provide novel insights into the function and evolution of defensive strategies in mixed-  
301 species prey communities. We show that a basic measure, such as vertical flight strength, can reveal  
302 both stereotypy and variability in escape strategies within and between species. We show that evasive  
303 flight in moths is more variable on the community level than within any single species, confirming  
304 escape-tactic diversity hypothesis for eared moths. This inter-specific variability adds to the total  
305 unpredictability of evasive flight that a predator experiences, and suggests a benefit of mixed-species  
306 groups for prey animals.

307

308 **DATA, CODE AND MATERIALS**

309 Data will be deposited on DRYAD and made available upon acceptance

310

311 **COMPETING INTERESTS**

312 We have no competing interests

313

314 **AUTHORS' CONTRIBUTIONS**

315 TH contributed to study design, collected and analysed the data, and wrote the manuscript

316 HRG conceived, designed and supervised the study, and contributed to data analysis, interpretation  
317 and manuscript writing.

318

319 **ACKNOWLEDGEMENTS**

320 We thank Erich Koch for help with setup development and Felix Härtl for help with the light traps.

321 We are grateful to Boyan Zlatkov for the assistance with moth identification. We thank the Max  
322 Planck Institute for Ornithology Seewiesen for providing excellent infrastructure and support, and the  
323 IMPRS for Organismal Biology for support and funding. Further, we thank Martin Yordanov  
324 Georgiev for help with data collection, Fränzi Korner for statistical advice, and Sue Anne Zollinger for  
325 comments on a previous version this manuscript.

326

327 **FUNDING**

328 Deutsche Forschungsgemeinschaft (Emmy Noether research grant GO2029/2-1 to H.R.G.)

329 IMPRS for Organismal Biology (to T.H.)

330

331 REFERENCES

- 332 1. Howland HC. 1974 Optimal strategies for predator avoidance: The relative importance of  
333 speed and manoeuvrability. *Journal of Theoretical Biology* **47**, 333–350.  
334 (doi:10.1016/0022-5193(74)90202-1)
- 335 2. Humphries DA, Driver PM. 1970 Protean defense by prey animals. *Oecologia* **5**, 285–  
336 302. (doi:10.1007/BF00815496)
- 337 3. Humphries DA, Driver PM. 1967 Erratic display as a device against predators. *Science*  
338 **156**, 1767–1768. (doi:10.1126/SCIENCE.156.3783.1767)
- 339 4. Schall JJ, Pianka ER. 1985 Evolution of escape behavior diversity. *Am Nat* **115**, 551–566.  
340 (doi:http://dx.doi.org/10.2307/2460484)
- 341 5. Wolf NG. 1985 Odd fish abandon mixed-species groups when threatened. *Behav Ecol*  
342 *Sociobiol* **17**, 47–52. (doi:10.1007/BF00299428)
- 343 6. Hölker F, Dörner H, Schulze T, Haertel-Borer SS, Peacor SD, Mehner T. 2007 Species-  
344 specific responses of planktivorous fish to the introduction of a new piscivore:  
345 implications for prey fitness. *Freshw Biol* **52**, 1793–1806. (doi:10.1111/j.1365-  
346 2427.2007.01810.x)
- 347 7. Wohlfahrt B, Mikolajewski DJ, Joop G, Suhling F. 2006 Are behavioural traits in prey  
348 sensitive to the risk imposed by predatory fish? *Freshw Biol* **51**, 76–84.  
349 (doi:10.1111/j.1365-2427.2005.01475.x)
- 350 8. Randall JA, Hatch SM, Hekkala ER. 1995 Inter-specific variation in anti-predator  
351 behavior in sympatric species of kangaroo rat. *Behav Ecol Sociobiol* **36**, 243–250.  
352 (doi:10.1007/BF00165833)
- 353 9. Wilson AM *et al.* 2018 Biomechanics of predator–prey arms race in lion, zebra, cheetah  
354 and impala. *Nature* **554**, 183–188. (doi:10.1038/nature25479)
- 355 10. Ter Hofstede HM, Ratcliffe JM. 2016 Evolutionary escalation: the bat-moth arms race. *J*  
356 *Exp Biol* **219**, 1589–602. (doi:10.1242/jeb.086686)
- 357 11. Rydell J, Jones G, Waters DA. 1995 Echolocating bats and hearing moths: Who are the  
358 winners? *Oikos* **73**, 419–424. (doi:Doi 10.2307/3545970)
- 359 12. Waters DA. 2003 Bats and moths: What is there left to learn? *Physiological Entomology*  
360 **28**, 237–250. (doi:10.1111/j.1365-3032.2003.00355.x)
- 361 13. Anthony ELP, Kunz TH. 1977 Feeding strategies of the little brown bat, *Myotis*  
362 *Lucifugus*, in southern New Hampshire. *Ecology* **58**, 775–786. (doi:10.2307/1936213)
- 363 14. Bogdanowicz W, Fenton MB, Daleszczyk K. 1999 The relationships between  
364 echolocation calls, morphology and diet in insectivorous bats. *J Zool* **247**, 381–393.  
365 (doi:10.1111/j.1469-7998.1999.tb01001.x)
- 366 15. Findley JS, Black H. 1983 Morphological and dietary structuring of a Zambian  
367 insectivorous bat community. *Ecology* **64**, 625–630. (doi:10.2307/1937180)

- 368 16. Denzinger A, Schnitzler H-U. 2013 Bat guilds, a concept to classify the highly diverse  
369 foraging and echolocation behaviors of microchiropteran bats. *Front Psychol* **4**, 1–15.
- 370 17. Fenton MB, Portfors CV, Rautenbach IL, Waterman JM. 1998 Compromises: sound  
371 frequencies used in echolocation by aerial-feeding bats. *Can J Zool* **76**, 1174–1182.  
372 (doi:10.1139/z98-043)
- 373 18. Roeder KD. 1962 The behaviour of free flying moths in the presence of artificial  
374 ultrasonic pulses. *Anim Behav* **10**, 300–304. (doi:10.1016/0003-3472(62)90053-2)
- 375 19. Corcoran AJ, Conner WE. 2012 Sonar jamming in the field: effectiveness and behavior  
376 of unique prey defense. *J Exp Biol* **215**, 4278–4287. (doi:10.1242/jeb.076943)
- 377 20. Svensson M, Rydell J, Brown R. 1999 Bat predation and flight timing of winter moths,  
378 *Epirrita* and *Operophtera* species (Lepidoptera, Geometridae). *Oikos* **84**, 193–198.  
379 (doi:10.2307/3546713)
- 380 21. Rydell J, Roininen H, Philip KW. 2000 Persistence of bat defence reactions in high arctic  
381 moths (Lepidoptera). *Proc Royal Soc B* **267**, 553–7. (doi:10.1098/rspb.2000.1036)
- 382 22. Göpfert MC, Wasserthal LT. 1999 Auditory sensory cells in hawkmoths: identification,  
383 physiology and structure. *J Exp Biol* **202**, 1579–1587.
- 384 23. Nakano R, Ihara F, Mishihiro K, Toyama M, Toda S. 2015 High duty cycle pulses suppress  
385 orientation flights of crambid moths. *J Insect Physiol* **83**, 15–21.  
386 (doi:10.1016/j.jinsphys.2015.11.004)
- 387 24. Fullard JH, Muma KE, Dawson JW. 2003 Quantifying an anti-bat flight response by  
388 eared moths. *Can J Zool* **81**, 395–399. (doi:10.1139/z03-019)
- 389 25. Treat AE. 1955 The response to sound in certain Lepidoptera. *Ann Entomol Soc Am* **48**,  
390 272–284. (doi:10.1093/aesa/48.4.272)
- 391 26. Roeder KD. 1966 A differential anemometer for measuring the turning tendency of  
392 insects in stationary flight. *Science* **153**, 1634–6.
- 393 27. Rydell J, Skals N, Surlykke A, Svensson M. 1997 Hearing and bat defence in geometrid  
394 winter moths. *Proc Biol Sci* **264**, 83–88. (doi:10.1098/rspb.1997.0012)
- 395 28. Agee HR. 1969 Response of flying bollworm moths and other tympanate moths to pulsed  
396 ultrasound. *Ann Entomol Soc Am* **62**, 801–807. (doi:10.1093/aesa/62.4.801)
- 397 29. Berwaerts K, Van Dyck H, Aerts P. 2002 Does flight morphology relate to flight  
398 performance? An experimental test with the butterfly *Pararge aegeria*. *Funct Ecol* **16**,  
399 484–491. (doi:10.1046/j.1365-2435.2002.00650.x)
- 400 30. Dudley R. 2002 Mechanisms and implications of animal flight maneuverability. *Integr*  
401 *Comp Biol* **42**, 135–140. (doi:10.1093/icb/42.1.135)
- 402 31. Corcoran AJ, Conner WE. 2017 Predator counteradaptations: stealth echolocation  
403 overcomes insect sonar-jamming and evasive-maneuvring defences. *Animal Behav* **132**,  
404 291–301. (doi:10.1016/J.ANBEHAV.2017.08.018)

- 405 32. Gordon SD, Ter Hofstede HM. 2018 The influence of bat echolocation call duration and  
406 timing on auditory encoding of predator distance in noctuid moths. *J Exp Biol* **221**,  
407 jeb171561. (doi:10.1242/jeb.171561)
- 408 33. Roeder KD. 1974 Responses of the less sensitive acoustic sense cells in the tympanic  
409 organs of some noctuid and geometrid moths. *J Insect Physiol* **20**, 55–66.  
410 (doi:10.1016/0022-1910(74)90123-1)
- 411 34. Madsen BM, Miller LA. 1987 Auditory input to motor neurons of the dorsal longitudinal  
412 flight muscles in a noctuid moth (*Barathra brassicae* L.). *J. Comp. Physiol.* **160**, 23–31.  
413 (doi:10.1007/BF00613438)
- 414 35. Ter Hofstede HM, Goerlitz HR, Ratcliffe JM, Holderied MW, Surlykke A. 2013 The  
415 simple ears of noctuid moths are tuned to the calls of their sympatric bat community. *J*  
416 *Exp Biol* **216**, 3954–3962. (doi:10.1242/jeb.093294)
- 417 36. Zha Y, Chen Q, Lei C. 2009 Ultrasonic hearing in moths. *Ann Soc Entomol Fr* **45**, 145–  
418 156. (doi:10.1080/00379271.2009.10697598)
- 419 37. Surlykke A. 2003 Hearing in hooktip moths (Drepanidae: Lepidoptera). *J Exp Biol* **206**,  
420 2653–2663. (doi:10.1242/jeb.00469)
- 421 38. Waters DA, Jones G. 1996 The peripheral auditory characteristics of noctuid moths:  
422 Responses to the search-phase echolocation calls of bats. *J Exp Biol* **199**, 847–856.
- 423 39. Schnitzler H-U, Moss CF, Denzinger A. 2003 From spatial orientation to food acquisition  
424 in echolocating bats. *Trends Ecol Evol* **18**, 386–394. (doi:10.1016/S0169-5347(03)00185-  
425 X)
- 426 40. Schnitzler H-U, Kalko EKV. 2001 Echolocation by insect-eating bats. *BioScience* **51**,  
427 557–569. (doi:10.1641/0006-3568(2001)051[0557:EBIEB]2.0.CO;2)
- 428 41. Skiba R. 2014 *Europäische Fledermäuse*. 2. Edition. Magdeburg: VerlagsKG Wolf.
- 429 42. Steiner A, Ratzel U, Top-Jensen M, Fibiger M. 2014 *Die Nachtfalter Deutschlands. Ein*  
430 *Feldführer*. Oestermarie, Denmark: Bugbook Publishing.
- 431 43. Taylor GK. 2001 Mechanics and aerodynamics of insect flight control. *Biol Rev* **76**, 449–  
432 471. (doi:10.1017/S1464793101005759)
- 433 44. Lewanzik D, Goerlitz HR. 2017 Continued source level reduction during attack in the  
434 low-amplitude bat *Barbastella barbastellus* prevents moth evasive flight. *Funct Ecol* **32**,  
435 1251–1261. (doi:10.1111/1365-2435.13073)
- 436 45. Siemers BM, Schnitzler H-U. 2004 Echolocation signals reflect niche differentiation in  
437 five sympatric congeneric bat species. *Nature* **429**, 657–661. (doi:10.1038/nature02547)
- 438  
439



440 **FIGURES**

441

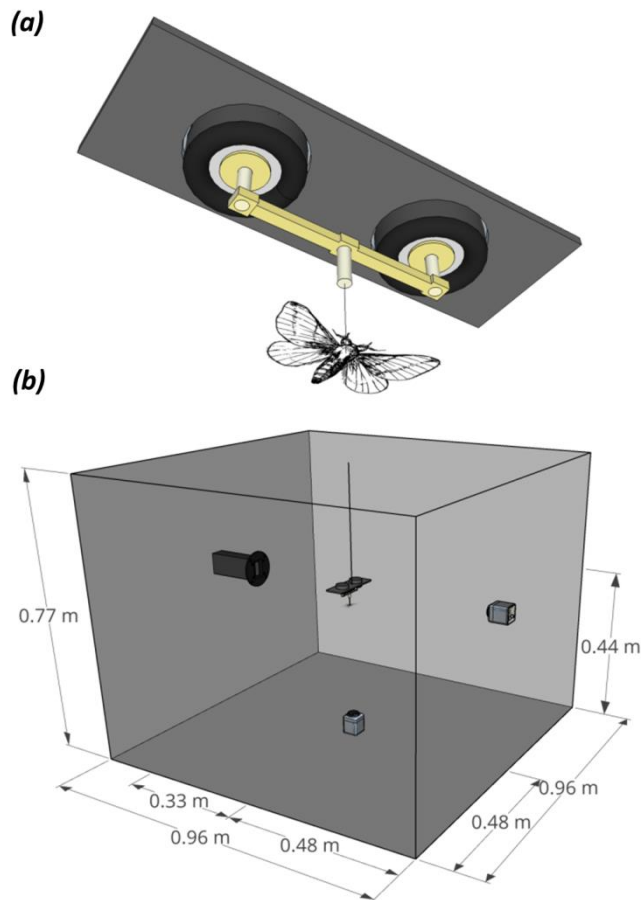

442

443 **Figure 1: flight recorder system for recording flight strength.** (a) Flight recorder consisting of two  
444 speakers connected by a wooden connector, which held the moth via a needle glued to the moth's  
445 thorax. (b) The flight recorder was mounted in the centre of an anechoic chamber, which also hold an  
446 ultrasonic speaker (left) to present stimuli and two IR-cameras (right and bottom). Moths were  
447 orientated to face away from the speaker.

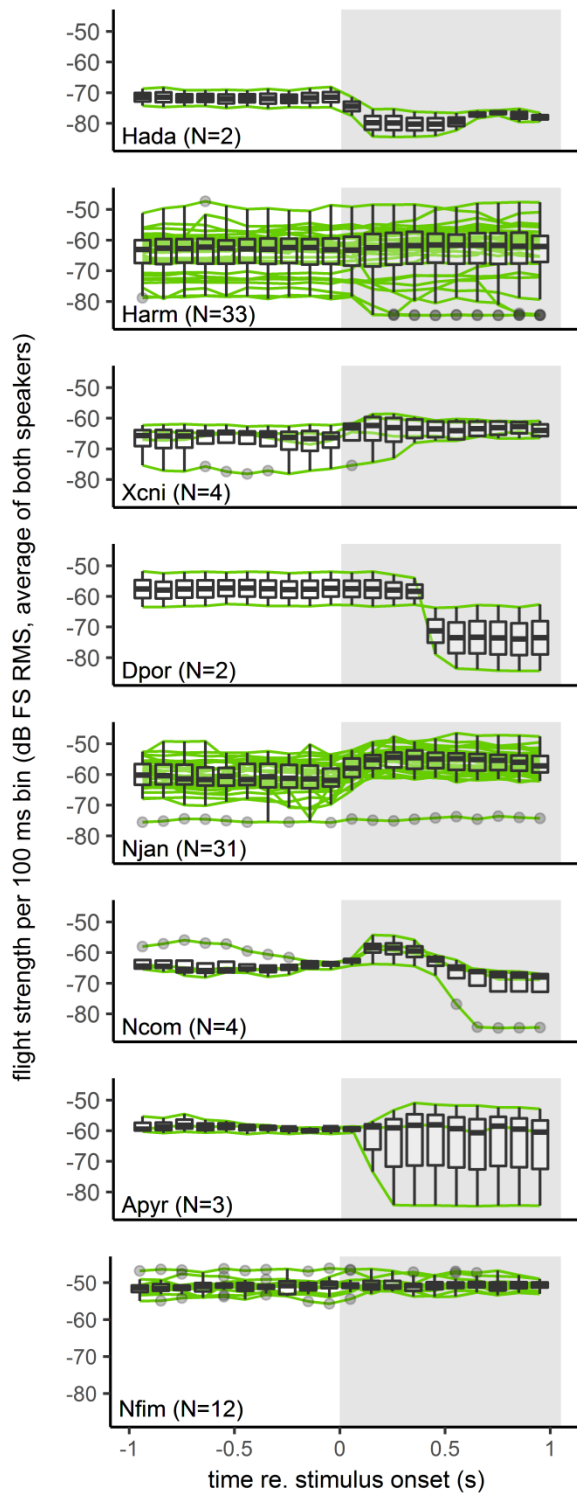

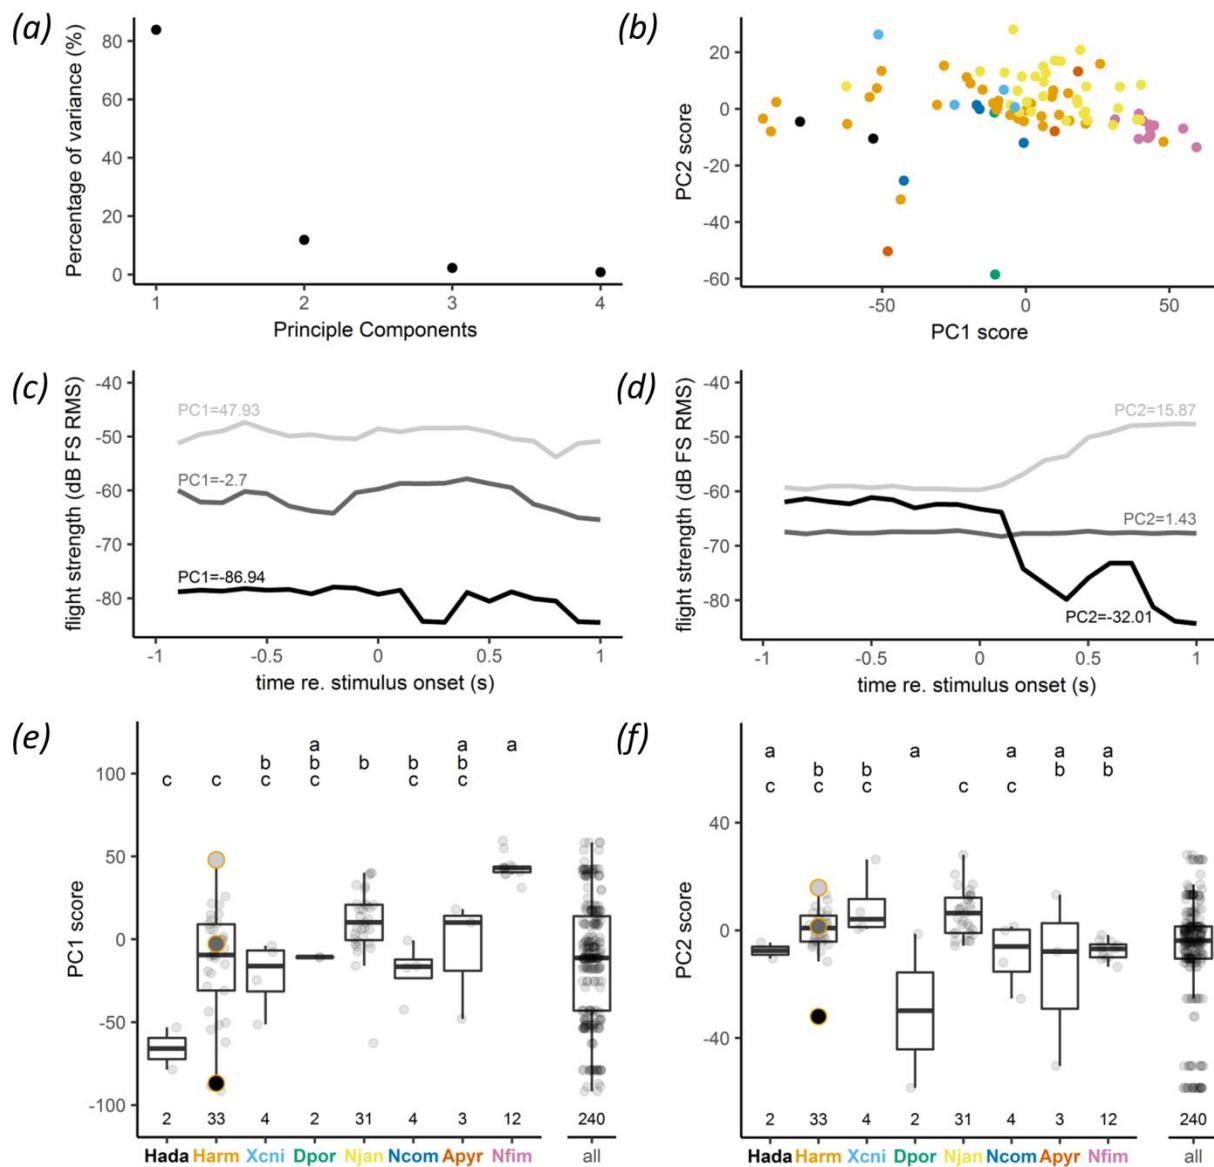

456

457 **Figure 3: Principle components of moths flying before stimulus onset (“active” moths).** (a)

458 Percentage of variance explained by the first four principle components. (b) PC1 scores as a function

459 of PC2 scores; for species colour code see panels e) and g). (c, d) Example flight behaviours for high

460 (light grey), medium (dark grey) and low (black) values for PC1 and PC2. (e, f) PC1 and PC2 scores

461 for each species and for the whole population (“all”), which was created by randomly sampling 30

462 values from each species. Species are ordered with increasing surface area from left to right. Letters

463 above boxes indicate significant differences. Circled data points refer to examples shown above.

464 Boxplots show median, quartiles, whiskers (1.5 x inter-quartile range) and outliers beyond the

465 whiskers.
